# Supplementary material for: A facile molecularly imprinted electrochemical sensor based on graphene: application to the selective determination of thiamethoxam in grain
Source: Royal Society of Chemistry journal article supplement (doi:10.1039/c7ra05167k), 2017-01-01
Supplement: c7ra05167k1.pdf [file c7ra05167k1.pdf]

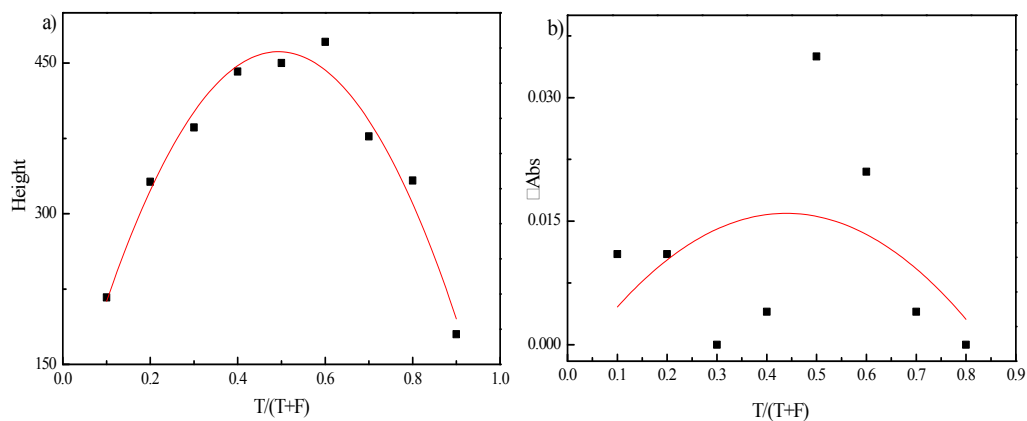

Fig. S1 TMX and VBA Job's analysis. a) spectrofluorimetry analysis. b) ultraviolet spectrum analysis.

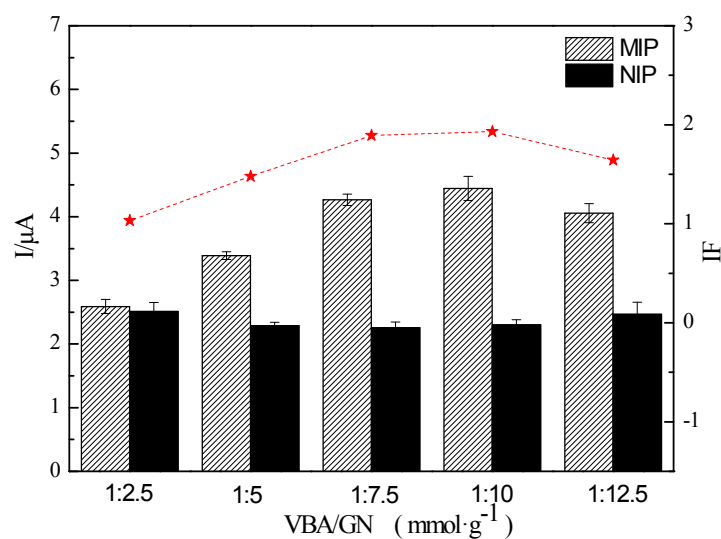

Fig. S2 The effect of the amount of VBA on response of 5 µmol/L TMX on MIPs-GN/GCE.

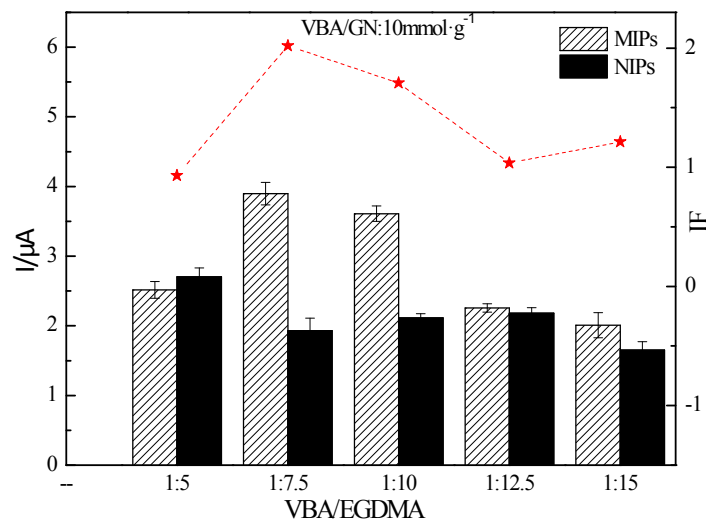

Fig. S3 The effect of the amount of cross linker on response of 5 µmol/L MX on MIPs-GN/GCE:VBA/GN=10 mmol/g

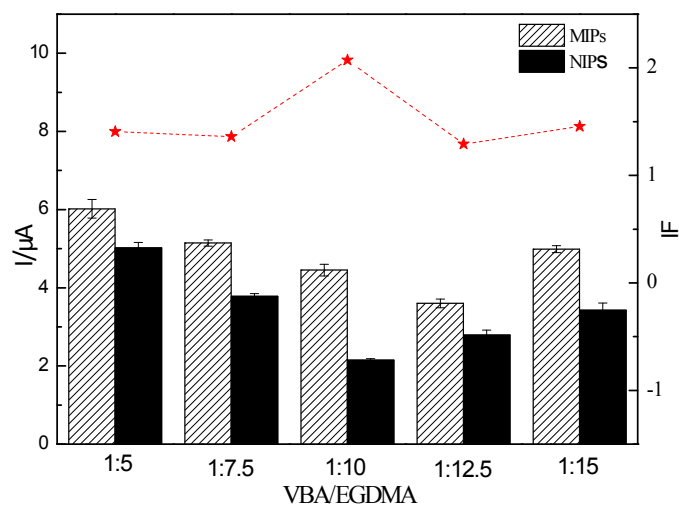

Fig. S4 The effect of the amount of AIBN on LSV current response of 5  $\mu\text{mol/L}$  TMX on MIPs-GN/GCE

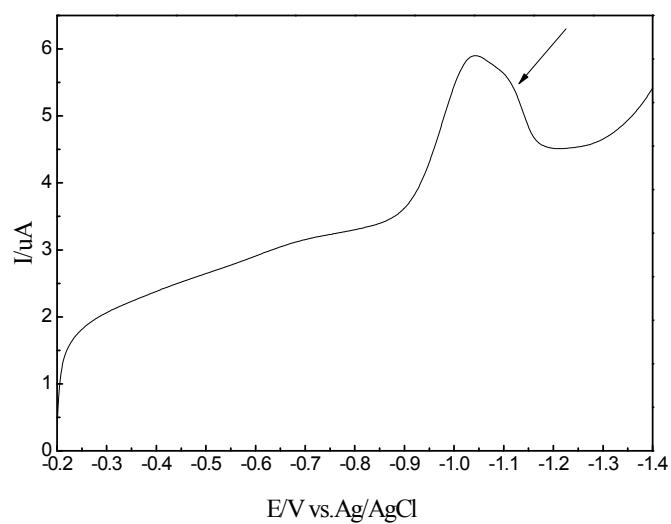

Fig.S5 LSV of 60  $\mu\text{mol/L}$  TMX on MIPs-GN/GCE

Table S1 Comparison of adsorption kinetics model parameters

| 模型      | 线性方程               |               | 参数            |
|---------|--------------------|---------------|---------------|
| 动力学一级模型 | $y=0.5993-0.1097x$ | $R^2= 0.9368$ | $K_1=0.2527$  |
| 动力学二级模型 | $y=1.5433+0.2144x$ | $R^2= 0.9414$ | $K_2=0.02978$ |
